# Supplementary material for: Production of a Monoclonal Antibody to the Nucleocapsid Protein of SARS-CoV-2 and Its Application to ELISA-Based Detection Methods with Broad Specificity by Combined Use of Detector Antibodies
Source: MDPI journal article supplement (doi:10.3390/v15010028), 2022-12-21
Supplement: s1 [file s1]

**Supplementary Table S1.** Raw data of ELISA assay corresponding to Figure 1A

| Ascites dilution fold | Replicate 1 | Replicate 2 | Replicate 3 |
|-----------------------|-------------|-------------|-------------|
| 10000                 | 1.637       | 1.094       | 0.941       |
| 40000                 | 1.077       | 0.559       | 0.325       |
| 160000                | 0.389       | 0.177       | 0.13        |
| 640000                | 0.154       | 0.092       | 0.078       |
| 2560000               | 0.083       | 0.066       | 0.063       |
| 10240000              | 0.065       | 0.059       | 0.058       |
| 40960000              | 0.061       | 0.058       | 0.056       |
| 163840000             | 0.055       | 0.052       | 0.053       |

**Supplementary Table S2.** Raw data of ELISA assay corresponding to Figure 1C

| Antibody concentration (ng/ml) | Total IgG | IgG1   | IgG2a  | IgG2b  | IgG3   |
|--------------------------------|-----------|--------|--------|--------|--------|
| 1000                           | 1.6412    | 0.1363 | 1.8186 | 0.1153 | 0.1337 |
| 250                            | 1.5188    | 0.1330 | 1.6317 | 0.1044 | 0.1100 |
| 62.5                           | 1.2474    | 0.1379 | 1.3420 | 0.1028 | 0.1009 |
| 15.625                         | 0.9187    | 0.1405 | 0.7826 | 0.1007 | 0.0981 |
| 3.90625                        | 0.6348    | 0.1555 | 0.3741 | 0.0995 | 0.0919 |
| 0.9765625                      | 0.2981    | 0.1632 | 0.1969 | 0.1009 | 0.0946 |
| 0.244140625                    | 0.2234    | 0.1420 | 0.2534 | 0.0954 | 0.1015 |
| 0                              | 0.1883    | 0.1437 | 0.1349 | 0.1146 | 0.1482 |

**Supplementary Table S3.** Raw data of ELISA assay corresponding to Figure 1D

| Antibody concentration (nM) | Normal mIgG |             |        |        | 2A7H9       |             |        |        |
|-----------------------------|-------------|-------------|--------|--------|-------------|-------------|--------|--------|
|                             | Replicate 1 | Replicate 2 | Avg    | Std    | Replicate 1 | Replicate 2 | Avg    | Std    |
| 1000                        | 0.1093      | 0.1292      | 0.1193 | 0.0141 | 0.8034      | 0.6727      | 0.7381 | 0.0924 |
| 200                         | 0.1034      | 0.0736      | 0.0885 | 0.0211 | 0.9203      | 1.0155      | 0.9679 | 0.0673 |
| 40                          | 0.0568      | 0.0603      | 0.0586 | 0.0025 | 1.0316      | 0.9810      | 1.0063 | 0.0358 |
| 8                           | 0.0574      | 0.0526      | 0.0550 | 0.0034 | 0.8316      | 0.9121      | 0.8719 | 0.0569 |
| 1.6                         | 0.0594      | 0.0532      | 0.0563 | 0.0044 | 0.4591      | 0.4533      | 0.4562 | 0.0041 |
| 0.32                        | 0.0598      | 0.0524      | 0.0561 | 0.0052 | 0.1920      | 0.2013      | 0.1967 | 0.0066 |
| 0.064                       | 0.0563      | 0.0523      | 0.0543 | 0.0028 | 0.0856      | 0.0821      | 0.0839 | 0.0025 |
| 0.0128                      | 0.0546      | 0.0543      | 0.0545 | 0.0002 | 0.0621      | 0.0621      | 0.0621 | 0.0000 |
| 0.00256                     | 0.0544      | 0.0543      | 0.0544 | 0.0001 | 0.0546      | 0.0564      | 0.0555 | 0.0013 |
| 0.000512                    | 0.0573      | 0.0584      | 0.0579 | 0.0008 | 0.0592      | 0.0542      | 0.0567 | 0.0035 |
| 0.0001024                   | 0.0584      | 0.0564      | 0.0574 | 0.0014 | 0.0651      | 0.0600      | 0.0626 | 0.0036 |
| 0.00002048                  | 0.0587      | 0.0550      | 0.0569 | 0.0026 | 0.0594      | 0.0586      | 0.0590 | 0.0006 |

**Supplementary Table S4.** Raw data of ELISA assay corresponding to Figure 2A

| Antigen concentration (ng/well) | Normal mIgG |             |             |        |        | 1G10C4      |             |             |        |        | 2A7H9       |             |             |        |        |
|---------------------------------|-------------|-------------|-------------|--------|--------|-------------|-------------|-------------|--------|--------|-------------|-------------|-------------|--------|--------|
|                                 | Replicate 1 | Replicate 2 | Replicate 3 | Avg    | Std    | Replicate 1 | Replicate 2 | Replicate 3 | Avg    | Std    | Replicate 1 | Replicate 2 | Replicate 3 | Avg    | Std    |
| 10                              | 0.0835      | 0.0710      | 0.0615      | 0.0720 | 0.0110 | 2.1797      | 1.3282      | 1.0484      | 1.5188 | 0.5892 | 0.8395      | 0.9570      | 1.3398      | 1.0454 | 0.2616 |
| 3.333                           | 0.0711      | 0.0572      | 0.0568      | 0.0617 | 0.0081 | 1.2119      | 0.9239      | 0.7807      | 0.9722 | 0.2196 | 0.4379      | 0.4894      | 0.6281      | 0.5185 | 0.0984 |
| 1.111                           | 0.0605      | 0.0574      | 0.0535      | 0.0571 | 0.0035 | 0.4289      | 0.3560      | 0.2861      | 0.3570 | 0.0714 | 0.1941      | 0.2221      | 0.2971      | 0.2378 | 0.0533 |
| 0.370                           | 0.0595      | 0.0550      | 0.0546      | 0.0564 | 0.0027 | 0.2266      | 0.1878      | 0.1585      | 0.1910 | 0.0342 | 0.1099      | 0.1022      | 0.1219      | 0.1113 | 0.0099 |
| 0.123                           | 0.0590      | 0.0587      | 0.0535      | 0.0571 | 0.0031 | 0.1184      | 0.1023      | 0.0922      | 0.1043 | 0.0132 | 0.0692      | 0.0657      | 0.0759      | 0.0703 | 0.0052 |
| 0.041                           | 0.0609      | 0.0538      | 0.0520      | 0.0556 | 0.0047 | 0.0793      | 0.0707      | 0.0639      | 0.0713 | 0.0077 | 0.0552      | 0.0573      | 0.0600      | 0.0575 | 0.0024 |
| 0.014                           | 0.0607      | 0.0542      | 0.0528      | 0.0559 | 0.0042 | 0.0671      | 0.0589      | 0.0554      | 0.0605 | 0.0060 | 0.0517      | 0.0557      | 0.0616      | 0.0563 | 0.0050 |
| 0.005                           | 0.0657      | 0.0574      | 0.0532      | 0.0588 | 0.0064 | 0.0605      | 0.0573      | 0.0533      | 0.0570 | 0.0036 | 0.0556      | 0.0548      | 0.0716      | 0.0607 | 0.0095 |

**Supplementary Table S5.** Raw data of ELISA assay corresponding to Figure 2B

| Antibody concentration (ng/well) | Normal mIgG |             |             |        |        | 1G10C4      |             |             |        |        | 2A7H9       |             |             |        |        |
|----------------------------------|-------------|-------------|-------------|--------|--------|-------------|-------------|-------------|--------|--------|-------------|-------------|-------------|--------|--------|
|                                  | Replicate 1 | Replicate 2 | Replicate 3 | Avg    | Std    | Replicate 1 | Replicate 2 | Replicate 3 | Avg    | Std    | Replicate 1 | Replicate 2 | Replicate 3 | Avg    | Std    |
| 10                               | 0.0577      | 0.0632      | 0.0649      | 0.0619 | 0.0038 | 1.8957      | 1.8521      | 2.1837      | 1.9772 | 0.1802 | 1.7057      | 1.6265      | 1.7134      | 1.6819 | 0.0481 |
| 3.333                            | 0.0542      | 0.0543      | 0.0566      | 0.0550 | 0.0014 | 1.4601      | 1.4824      | 1.5982      | 1.5136 | 0.0741 | 1.4013      | 1.4798      | 1.5851      | 1.4887 | 0.0922 |
| 1.111                            | 0.0517      | 0.0522      | 0.0559      | 0.0533 | 0.0023 | 0.6679      | 0.7997      | 0.8762      | 0.7813 | 0.1054 | 0.8139      | 0.8628      | 1.0868      | 0.9212 | 0.1455 |
| 0.370                            | 0.0504      | 0.0518      | 0.0576      | 0.0533 | 0.0038 | 0.2466      | 0.3023      | 0.3166      | 0.2885 | 0.0370 | 0.3506      | 0.3898      | 0.4694      | 0.4033 | 0.0605 |
| 0.123                            | 0.0551      | 0.0503      | 0.0499      | 0.0518 | 0.0029 | 0.0933      | 0.1323      | 0.1366      | 0.1207 | 0.0239 | 0.1266      | 0.1558      | 0.1806      | 0.1543 | 0.0270 |
| 0.041                            | 0.0499      | 0.0517      | 0.0504      | 0.0507 | 0.0009 | 0.0682      | 0.0792      | 0.0757      | 0.0744 | 0.0056 | 0.0717      | 0.0719      | 0.0988      | 0.0808 | 0.0156 |
| 0.014                            | 0.0515      | 0.0552      | 0.0516      | 0.0528 | 0.0021 | 0.0653      | 0.0604      | 0.0604      | 0.0620 | 0.0028 | 0.0596      | 0.0594      | 0.0628      | 0.0606 | 0.0019 |
| 0.005                            | 0.0519      | 0.0516      | 0.0524      | 0.0520 | 0.0004 | 0.0558      | 0.0572      | 0.0562      | 0.0564 | 0.0007 | 0.0546      | 0.0551      | 0.0686      | 0.0594 | 0.0079 |

**Supplementary Table S6.** Raw data of ELISA assay corresponding to Figure 2C

| Antibody concentration (ng/well) | Mouse IgG2a |             |        |        | Normal mIgG |             |        |        | Normal hIgG |             |        |        |
|----------------------------------|-------------|-------------|--------|--------|-------------|-------------|--------|--------|-------------|-------------|--------|--------|
|                                  | Replicate 1 | Replicate 2 | Avg    | Std    | Replicate 1 | Replicate 2 | Avg    | Std    | Replicate 1 | Replicate 2 | Avg    | Std    |
| 10                               | 0.0535      | 0.0565      | 0.0550 | 0.0021 | 0.0575      | 0.0535      | 0.0555 | 0.0028 | 0.0617      | 0.0604      | 0.0611 | 0.0009 |
| 3.333                            | 0.0555      | 0.0518      | 0.0537 | 0.0026 | 0.0540      | 0.0536      | 0.0538 | 0.0003 | 0.0605      | 0.0579      | 0.0592 | 0.0018 |
| 1.111                            | 0.0529      | 0.0559      | 0.0544 | 0.0021 | 0.0542      | 0.0533      | 0.0538 | 0.0006 | 0.0549      | 0.0545      | 0.0547 | 0.0003 |
| 0.370                            | 0.0547      | 0.0535      | 0.0541 | 0.0008 | 0.0527      | 0.0540      | 0.0534 | 0.0009 | 0.0578      | 0.0519      | 0.0549 | 0.0042 |
| 0.123                            | 0.0539      | 0.0545      | 0.0542 | 0.0004 | 0.0533      | 0.0574      | 0.0554 | 0.0029 | 0.0540      | 0.0546      | 0.0543 | 0.0004 |
| 0.041                            | 0.0548      | 0.0733      | 0.0641 | 0.0131 | 0.0530      | 0.0529      | 0.0530 | 0.0001 | 0.0554      | 0.0536      | 0.0545 | 0.0013 |
| 0.014                            | 0.0625      | 0.0545      | 0.0585 | 0.0057 | 0.0549      | 0.0656      | 0.0603 | 0.0076 | 0.0668      | 0.0523      | 0.0596 | 0.0103 |
| 0.005                            | 0.0540      | 0.0520      | 0.0530 | 0.0014 | 0.0521      | 0.0526      | 0.0524 | 0.0004 | 0.0553      | 0.0535      | 0.0544 | 0.0013 |

**Supplementary Table S7.** Raw data of ELISA assay corresponding to Figure 3A

| Antigen concentration (ng/well) | 1G10C4 mAb-bio |             |             |        |        | 2A7H9 mAb-bio |             |             |        |        | Mouse IgG2a-bio |             |             |        |        |
|---------------------------------|----------------|-------------|-------------|--------|--------|---------------|-------------|-------------|--------|--------|-----------------|-------------|-------------|--------|--------|
|                                 | Replicate 1    | Replicate 2 | Replicate 3 | Avg    | Std    | Replicate 1   | Replicate 2 | Replicate 3 | Avg    | Std    | Replicate 1     | Replicate 2 | Replicate 3 | Avg    | Std    |
| 10                              | 1.4235         | 1.2844      | 1.3516      | 1.3532 | 0.0696 | 1.6671        | 1.6691      | 1.4368      | 1.5910 | 0.1335 | 0.0720          | 0.0748      | 0.0739      | 0.0736 | 0.0014 |
| 3.333                           | 0.7574         | 0.7191      | 0.7852      | 0.7539 | 0.0332 | 1.1922        | 1.2055      | 0.9892      | 1.1290 | 0.1212 | 0.0993          | 0.0736      | 0.0733      | 0.0821 | 0.0149 |
| 1.111                           | 0.3757         | 0.3478      | 0.3775      | 0.3670 | 0.0167 | 0.6886        | 0.7760      | 0.8418      | 0.7688 | 0.0769 | 0.0699          | 0.0786      | 0.0694      | 0.0726 | 0.0052 |
| 0.370                           | 0.1645         | 0.1738      | 0.1895      | 0.1759 | 0.0126 | 0.4951        | 0.4890      | 0.4610      | 0.4817 | 0.0182 | 0.0752          | 0.0703      | 0.0752      | 0.0736 | 0.0028 |
| 0.123                           | 0.0917         | 0.0982      | 0.1037      | 0.0979 | 0.0060 | 0.2238        | 0.2483      | 0.2592      | 0.2438 | 0.0181 | 0.0810          | 0.0708      | 0.0741      | 0.0753 | 0.0052 |
| 0.041                           | 0.0671         | 0.0683      | 0.0719      | 0.0691 | 0.0025 | 0.1164        | 0.1231      | 0.1157      | 0.1184 | 0.0041 | 0.0869          | 0.0772      | 0.0797      | 0.0813 | 0.0050 |
| 0.014                           | 0.0602         | 0.0663      | 0.0650      | 0.0638 | 0.0032 | 0.0773        | 0.0770      | 0.0787      | 0.0777 | 0.0009 | 0.0936          | 0.0936      | 0.0816      | 0.0896 | 0.0069 |
| 0.005                           | 0.0592         | 0.0618      | 0.0622      | 0.0611 | 0.0016 | 0.0653        | 0.0659      | 0.0641      | 0.0651 | 0.0009 | 0.1024          | 0.0890      | 0.1020      | 0.0978 | 0.0076 |

**Supplementary Table S8.** Raw data of ELISA assay corresponding to Figure 3B

| Antigen concentration (ng/well) | 1G10C4 mAb-bio |             |             |        |        | 2A7H9 mAb-bio |             |             |        |        | Mouse IgG2a-bio |             |             |        |        |
|---------------------------------|----------------|-------------|-------------|--------|--------|---------------|-------------|-------------|--------|--------|-----------------|-------------|-------------|--------|--------|
|                                 | Replicate 1    | Replicate 2 | Replicate 3 | Avg    | Std    | Replicate 1   | Replicate 2 | Replicate 3 | Avg    | Std    | Replicate 1     | Replicate 2 | Replicate 3 | Avg    | Std    |
| 10                              | 1.6355         | 1.6874      | 1.6001      | 1.6410 | 0.0439 | 1.2079        | 1.2980      | 1.3145      | 1.2735 | 0.0574 | 0.0668          | 0.0722      | 0.0789      | 0.0726 | 0.0061 |
| 3.333                           | 1.4643         | 1.2064      | 1.2887      | 1.3198 | 0.1317 | 0.7639        | 0.7564      | 0.6701      | 0.7301 | 0.0521 | 0.0706          | 0.0703      | 0.0642      | 0.0684 | 0.0036 |
| 1.111                           | 0.9344         | 0.8833      | 0.9219      | 0.9132 | 0.0266 | 0.2519        | 0.3782      | 0.3626      | 0.3309 | 0.0689 | 0.0589          | 0.0651      | 0.0616      | 0.0619 | 0.0031 |
| 0.370                           | 0.6129         | 0.6326      | 0.5406      | 0.5954 | 0.0484 | 0.1334        | 0.1306      | 0.1563      | 0.1401 | 0.0141 | 0.0607          | 0.0647      | 0.0574      | 0.0609 | 0.0037 |
| 0.123                           | 0.2484         | 0.2611      | 0.2171      | 0.2422 | 0.0226 | 0.0777        | 0.0826      | 0.0781      | 0.0795 | 0.0027 | 0.0656          | 0.0533      | 0.0628      | 0.0606 | 0.0064 |
| 0.041                           | 0.1278         | 0.1212      | 0.1270      | 0.1253 | 0.0036 | 0.0679        | 0.0716      | 0.0642      | 0.0679 | 0.0037 | 0.0654          | 0.0615      | 0.0623      | 0.0631 | 0.0021 |
| 0.014                           | 0.0751         | 0.0801      | 0.0808      | 0.0787 | 0.0031 | 0.0649        | 0.0640      | 0.0666      | 0.0652 | 0.0013 | 0.0626          | 0.0601      | 0.0673      | 0.0633 | 0.0037 |
| 0.005                           | 0.0634         | 0.0678      | 0.0639      | 0.0650 | 0.0024 | 0.0605        | 0.0602      | 0.0627      | 0.0611 | 0.0014 | 0.0645          | 0.0605      | 0.0582      | 0.0611 | 0.0032 |

**Supplementary Table S9.** Raw data of ELISA assay corresponding to Figure 3C

| Antigen concentration (ng/well) | 1G10C4 mAb-bio |             |             |        |        | 2A7H9 mAb-bio |             |             |        |        | Mouse IgG2a-bio |             |             |        |        |
|---------------------------------|----------------|-------------|-------------|--------|--------|---------------|-------------|-------------|--------|--------|-----------------|-------------|-------------|--------|--------|
|                                 | Replicate 1    | Replicate 2 | Replicate 3 | Avg    | Std    | Replicate 1   | Replicate 2 | Replicate 3 | Avg    | Std    | Replicate 1     | Replicate 2 | Replicate 3 | Avg    | Std    |
| 10                              | 0.0573         | 0.0653      | 0.0513      | 0.0580 | 0.0070 | 0.0573        | 0.0527      | 0.0595      | 0.0565 | 0.0035 | 0.0584          | 0.0552      | 0.0563      | 0.0566 | 0.0016 |
| 3.333                           | 0.0529         | 0.0544      | 0.0515      | 0.0529 | 0.0015 | 0.0505        | 0.0495      | 0.0511      | 0.0504 | 0.0008 | 0.0527          | 0.0521      | 0.0571      | 0.0540 | 0.0027 |
| 1.111                           | 0.0500         | 0.0534      | 0.0529      | 0.0521 | 0.0018 | 0.0520        | 0.0508      | 0.0498      | 0.0509 | 0.0011 | 0.0511          | 0.0530      | 0.0527      | 0.0523 | 0.0010 |
| 0.370                           | 0.0504         | 0.0506      | 0.0501      | 0.0504 | 0.0003 | 0.0509        | 0.0524      | 0.0514      | 0.0516 | 0.0008 | 0.0537          | 0.0540      | 0.0567      | 0.0548 | 0.0017 |
| 0.123                           | 0.0517         | 0.0530      | 0.0501      | 0.0516 | 0.0015 | 0.0553        | 0.0503      | 0.0511      | 0.0522 | 0.0027 | 0.0533          | 0.0533      | 0.0552      | 0.0539 | 0.0011 |
| 0.041                           | 0.0564         | 0.0479      | 0.0500      | 0.0514 | 0.0044 | 0.0524        | 0.0493      | 0.0485      | 0.0501 | 0.0021 | 0.0501          | 0.0516      | 0.0548      | 0.0522 | 0.0024 |
| 0.014                           | 0.0589         | 0.0521      | 0.0520      | 0.0543 | 0.0040 | 0.0513        | 0.0522      | 0.0512      | 0.0516 | 0.0006 | 0.0556          | 0.0543      | 0.0559      | 0.0553 | 0.0009 |
| 0.005                           | 0.0504         | 0.0504      | 0.0512      | 0.0507 | 0.0005 | 0.0538        | 0.0507      | 0.0520      | 0.0522 | 0.0016 | 0.0555          | 0.0531      | 0.0586      | 0.0557 | 0.0028 |

**Supplementary Table S10.** Raw data of ELISA assay corresponding to Figure 3D

| Antigen concentration (ng/well) | 1G10C4 mAb-bio |             |             |        |        | 2A7H9 mAb-bio |             |             |        |        | Mouse IgG2a-bio |             |             |        |        |
|---------------------------------|----------------|-------------|-------------|--------|--------|---------------|-------------|-------------|--------|--------|-----------------|-------------|-------------|--------|--------|
|                                 | Replicate 1    | Replicate 2 | Replicate 3 | Avg    | Std    | Replicate 1   | Replicate 2 | Replicate 3 | Avg    | Std    | Replicate 1     | Replicate 2 | Replicate 3 | Avg    | Std    |
| 10                              | 0.0496         | 0.0521      | 0.0498      | 0.0505 | 0.0014 | 0.0543        | 0.0553      | 0.0545      | 0.0547 | 0.0005 | 0.0549          | 0.0547      | 0.0552      | 0.0549 | 0.0003 |
| 3.333                           | 0.0500         | 0.0510      | 0.0529      | 0.0513 | 0.0015 | 0.0539        | 0.0510      | 0.0539      | 0.0529 | 0.0017 | 0.0568          | 0.0547      | 0.0615      | 0.0577 | 0.0035 |
| 1.111                           | 0.0498         | 0.0521      | 0.0512      | 0.0510 | 0.0012 | 0.0510        | 0.0555      | 0.0518      | 0.0528 | 0.0024 | 0.0552          | 0.0538      | 0.0543      | 0.0544 | 0.0007 |
| 0.370                           | 0.0497         | 0.0507      | 0.0518      | 0.0507 | 0.0011 | 0.0513        | 0.0524      | 0.0529      | 0.0522 | 0.0008 | 0.0547          | 0.0758      | 0.0570      | 0.0625 | 0.0116 |
| 0.123                           | 0.0528         | 0.0499      | 0.0550      | 0.0526 | 0.0026 | 0.0505        | 0.0512      | 0.0517      | 0.0511 | 0.0006 | 0.0543          | 0.0570      | 0.0553      | 0.0555 | 0.0014 |
| 0.041                           | 0.0507         | 0.0496      | 0.0532      | 0.0512 | 0.0018 | 0.0537        | 0.0496      | 0.0490      | 0.0508 | 0.0026 | 0.0542          | 0.0562      | 0.0547      | 0.0550 | 0.0010 |
| 0.014                           | 0.0498         | 0.0498      | 0.0549      | 0.0515 | 0.0029 | 0.0518        | 0.0573      | 0.0508      | 0.0533 | 0.0035 | 0.0576          | 0.0832      | 0.0547      | 0.0652 | 0.0157 |
| 0.005                           | 0.0497         | 0.0528      | 0.0510      | 0.0512 | 0.0016 | 0.0506        | 0.0508      | 0.0503      | 0.0506 | 0.0003 | 0.0565          | 0.0573      | 0.0550      | 0.0563 | 0.0012 |

**Supplementary Table S11.** Raw data of ELISA assay corresponding to Figure 4A

| Virus<br>(pfu/well) | Mock        |             |        |        | Omicron     |             |        |        |
|---------------------|-------------|-------------|--------|--------|-------------|-------------|--------|--------|
|                     | Replicate 1 | Replicate 2 | Avg    | Std    | Replicate 1 | Replicate 2 | Avg    | Std    |
| 20                  | 0.0630      | 0.0630      | 0.0630 | 0.0000 | 0.1548      | 0.2192      | 0.1870 | 0.0455 |
| 6.667               | 0.0605      | 0.0604      | 0.0605 | 0.0001 | 0.1385      | 0.1515      | 0.1450 | 0.0092 |
| 2.222               | 0.1372      | 0.0618      | 0.0995 | 0.0533 | 0.1056      | 0.1047      | 0.1052 | 0.0006 |
| 0.741               | 0.0604      | 0.0637      | 0.0621 | 0.0023 | 0.0837      | 0.0857      | 0.0847 | 0.0014 |
| 0.247               | 0.0608      | 0.0634      | 0.0621 | 0.0018 | 0.0751      | 0.0731      | 0.0741 | 0.0014 |
| 0.082               | 0.0622      | 0.0637      | 0.0630 | 0.0011 | 0.0751      | 0.0753      | 0.0752 | 0.0001 |
| 0.027               | 0.0605      | 0.0619      | 0.0612 | 0.0010 | 0.0694      | 0.0751      | 0.0723 | 0.0040 |
| 0.009               | 0.0590      | 0.0604      | 0.0597 | 0.0010 | 0.0793      | 0.0795      | 0.0794 | 0.0001 |

**Supplementary Table S12.** Raw data of ELISA assay corresponding to Figure 5A

| Virus<br>(pfu/well) | Mock        |             |        |        | S clade     |             |        |        |
|---------------------|-------------|-------------|--------|--------|-------------|-------------|--------|--------|
|                     | Replicate 1 | Replicate 2 | Avg    | Std    | Replicate 1 | Replicate 2 | Avg    | Std    |
| 20                  | 0.0475      | 0.0514      | 0.0495 | 0.0028 | 0.2065      | 0.2328      | 0.2197 | 0.0186 |
| 6.667               | 0.0496      | 0.0482      | 0.0489 | 0.0010 | 0.1951      | 0.1739      | 0.1845 | 0.0150 |
| 2.222               | 0.0501      | 0.0503      | 0.0502 | 0.0001 | 0.1225      | 0.1311      | 0.1268 | 0.0061 |
| 0.741               | 0.0494      | 0.0503      | 0.0499 | 0.0006 | 0.0768      | 0.0830      | 0.0799 | 0.0044 |
| 0.247               | 0.0575      | 0.0487      | 0.0531 | 0.0062 | 0.0693      | 0.0592      | 0.0643 | 0.0071 |
| 0.082               | 0.0480      | 0.0495      | 0.0488 | 0.0011 | 0.0528      | 0.0526      | 0.0527 | 0.0001 |
| 0.027               | 0.0517      | 0.0511      | 0.0514 | 0.0004 | 0.0511      | 0.0553      | 0.0532 | 0.0030 |
| 0.009               | 0.0501      | 0.0492      | 0.0497 | 0.0006 | 0.0495      | 0.0530      | 0.0513 | 0.0025 |

  

| Virus<br>(pfu/well) | Delta       |             |        |        | Iota        |             |        |        |
|---------------------|-------------|-------------|--------|--------|-------------|-------------|--------|--------|
|                     | Replicate 1 | Replicate 2 | Avg    | Std    | Replicate 1 | Replicate 2 | Avg    | Std    |
| 20                  | 0.2550      | 0.2988      | 0.2769 | 0.0310 | 0.6466      | 0.8726      | 0.7596 | 0.1598 |
| 6.667               | 0.1573      | 0.1841      | 0.1707 | 0.0190 | 0.3968      | 0.4137      | 0.4053 | 0.0120 |
| 2.222               | 0.0896      | 0.1163      | 0.1030 | 0.0189 | 0.1752      | 0.1752      | 0.1752 | 0.0000 |
| 0.741               | 0.0643      | 0.0705      | 0.0674 | 0.0044 | 0.0810      | 0.0912      | 0.0861 | 0.0072 |
| 0.247               | 0.0546      | 0.0592      | 0.0569 | 0.0033 | 0.2235      | 0.1715      | 0.1975 | 0.0368 |
| 0.082               | 0.0582      | 0.0566      | 0.0574 | 0.0011 | 0.0846      | 0.0557      | 0.0702 | 0.0204 |
| 0.027               | 0.0505      | 0.0535      | 0.0520 | 0.0021 | 0.0520      | 0.0577      | 0.0549 | 0.0040 |
| 0.009               | 0.0505      | 0.0513      | 0.0509 | 0.0006 | 0.0533      | 0.0518      | 0.0526 | 0.0011 |

  

| Virus<br>(pfu/well) | Mu          |             |        |        | Omicron     |             |        |        |
|---------------------|-------------|-------------|--------|--------|-------------|-------------|--------|--------|
|                     | Replicate 1 | Replicate 2 | Avg    | Std    | Replicate 1 | Replicate 2 | Avg    | Std    |
| 20                  | 0.9793      | 1.0732      | 1.0263 | 0.0664 | 1.0936      | 1.0117      | 1.0527 | 0.0579 |
| 6.667               | 0.8008      | 0.8113      | 0.8061 | 0.0074 | 0.6136      | 0.6843      | 0.6490 | 0.0500 |
| 2.222               | 0.4381      | 0.4107      | 0.4244 | 0.0194 | 0.2620      | 0.3022      | 0.2821 | 0.0284 |
| 0.741               | 0.1315      | 0.1597      | 0.1456 | 0.0199 | 0.1169      | 0.1209      | 0.1189 | 0.0028 |
| 0.247               | 0.0874      | 0.0916      | 0.0895 | 0.0030 | 0.0746      | 0.0757      | 0.0752 | 0.0008 |
| 0.082               | 0.0654      | 0.0642      | 0.0648 | 0.0008 | 0.0630      | 0.0609      | 0.0620 | 0.0015 |
| 0.027               | 0.0548      | 0.0571      | 0.0560 | 0.0016 | 0.0590      | 0.0580      | 0.0585 | 0.0007 |
| 0.009               | 0.0539      | 0.0561      | 0.0550 | 0.0016 | 0.0631      | 0.0699      | 0.0665 | 0.0048 |

**Supplementary Table S13.** Raw data of ELISA assay corresponding to Figure 5B

| Virus<br>(pfu/well) | Mock        |             |        |        | S clade     |             |        |        |
|---------------------|-------------|-------------|--------|--------|-------------|-------------|--------|--------|
|                     | Replicate 1 | Replicate 2 | Avg    | Std    | Replicate 1 | Replicate 2 | Avg    | Std    |
| 20                  | 0.0580      | 0.0575      | 0.0578 | 0.0004 | 1.2039      | 0.8240      | 1.0140 | 0.2686 |
| 6.667               | 0.0596      | 0.0588      | 0.0592 | 0.0006 | 0.8271      | 0.8060      | 0.8166 | 0.0149 |
| 2.222               | 0.0556      | 0.0597      | 0.0577 | 0.0029 | 0.4163      | 0.4788      | 0.4476 | 0.0442 |
| 0.741               | 0.0653      | 0.0582      | 0.0618 | 0.0050 | 0.2135      | 0.2534      | 0.2335 | 0.0282 |
| 0.247               | 0.0664      | 0.0600      | 0.0632 | 0.0045 | 0.1185      | 0.1203      | 0.1194 | 0.0013 |
| 0.082               | 0.0582      | 0.0572      | 0.0577 | 0.0007 | 0.0793      | 0.0829      | 0.0811 | 0.0025 |
| 0.027               | 0.0599      | 0.0589      | 0.0594 | 0.0007 | 0.0617      | 0.0641      | 0.0629 | 0.0017 |
| 0.009               | 0.0595      | 0.0591      | 0.0593 | 0.0003 | 0.0583      | 0.0578      | 0.0581 | 0.0004 |
| Virus<br>(pfu/well) | Delta       |             |        |        | Iota        |             |        |        |
|                     | Replicate 1 | Replicate 2 | Avg    | Std    | Replicate 1 | Replicate 2 | Avg    | Std    |
| 20                  | 0.6888      | 0.8176      | 0.7532 | 0.0911 | 0.6095      | 0.7697      | 0.6896 | 0.1133 |
| 6.667               | 0.5176      | 0.5362      | 0.5269 | 0.0132 | 0.3797      | 0.2645      | 0.3221 | 0.0815 |
| 2.222               | 0.1859      | 0.2400      | 0.2130 | 0.0383 | 0.1773      | 0.1501      | 0.1637 | 0.0192 |
| 0.741               | 0.1122      | 0.1153      | 0.1138 | 0.0022 | 0.1020      | 0.0856      | 0.0938 | 0.0116 |
| 0.247               | 0.0781      | 0.0737      | 0.0759 | 0.0031 | 0.0667      | 0.0645      | 0.0656 | 0.0016 |
| 0.082               | 0.0589      | 0.0584      | 0.0587 | 0.0004 | 0.0603      | 0.0569      | 0.0586 | 0.0024 |
| 0.027               | 0.0536      | 0.0551      | 0.0544 | 0.0011 | 0.0542      | 0.0534      | 0.0538 | 0.0006 |
| 0.009               | 0.0583      | 0.0557      | 0.0570 | 0.0018 | 0.0578      | 0.0519      | 0.0549 | 0.0042 |
| Virus<br>(pfu/well) | Mu          |             |        |        | Omicron     |             |        |        |
|                     | Replicate 1 | Replicate 2 | Avg    | Std    | Replicate 1 | Replicate 2 | Avg    | Std    |
| 20                  | 0.6787      | 0.4769      | 0.5778 | 0.1427 | 0.3889      | 0.3946      | 0.3918 | 0.0040 |
| 6.667               | 0.5087      | 0.4035      | 0.4561 | 0.0744 | 0.2333      | 0.2175      | 0.2254 | 0.0112 |
| 2.222               | 0.2556      | 0.1597      | 0.2077 | 0.0678 | 0.1209      | 0.1084      | 0.1147 | 0.0088 |
| 0.741               | 0.1378      | 0.1059      | 0.1219 | 0.0226 | 0.0717      | 0.0721      | 0.0719 | 0.0003 |
| 0.247               | 0.0839      | 0.0699      | 0.0769 | 0.0099 | 0.0624      | 0.0593      | 0.0609 | 0.0022 |
| 0.082               | 0.0626      | 0.0621      | 0.0624 | 0.0004 | 0.0551      | 0.0549      | 0.0550 | 0.0001 |
| 0.027               | 0.0616      | 0.0551      | 0.0584 | 0.0046 | 0.0531      | 0.0529      | 0.0530 | 0.0001 |
| 0.009               | 0.0527      | 0.0565      | 0.0546 | 0.0027 | 0.0505      | 0.0564      | 0.0535 | 0.0042 |

**Supplementary Table S14.** Raw data of ELISA assay corresponding to Figure 5C

| Virus<br>(pfu/well) | Mock        |             |        |        | S clade     |             |        |        |
|---------------------|-------------|-------------|--------|--------|-------------|-------------|--------|--------|
|                     | Replicate 1 | Replicate 2 | Avg    | Std    | Replicate 1 | Replicate 2 | Avg    | Std    |
| 20                  | 0.0710      | 0.0715      | 0.0713 | 0.0004 | 2.0755      | 1.8065      | 1.9410 | 0.1902 |
| 6.667               | 0.0718      | 0.0726      | 0.0722 | 0.0006 | 1.4764      | 1.2851      | 1.3808 | 0.1353 |
| 2.222               | 0.0690      | 0.0764      | 0.0727 | 0.0052 | 0.7373      | 0.6942      | 0.7158 | 0.0305 |
| 0.741               | 0.0767      | 0.0743      | 0.0755 | 0.0017 | 0.2174      | 0.2107      | 0.2141 | 0.0047 |
| 0.247               | 0.0793      | 0.0779      | 0.0786 | 0.0010 | 0.1206      | 0.1202      | 0.1204 | 0.0003 |
| 0.082               | 0.0664      | 0.0743      | 0.0704 | 0.0056 | 0.0856      | 0.0830      | 0.0843 | 0.0018 |
| 0.027               | 0.0732      | 0.0719      | 0.0726 | 0.0009 | 0.0738      | 0.0775      | 0.0757 | 0.0026 |
| 0.009               | 0.0696      | 0.0757      | 0.0727 | 0.0043 | 0.0746      | 0.0789      | 0.0768 | 0.0030 |
| Virus<br>(pfu/well) | Delta       |             |        |        | Iota        |             |        |        |
|                     | Replicate 1 | Replicate 2 | Avg    | Std    | Replicate 1 | Replicate 2 | Avg    | Std    |
| 20                  | 0.9669      | 0.7250      | 0.8460 | 0.1710 | 0.6525      | 0.6859      | 0.6692 | 0.0236 |
| 6.667               | 0.5998      | 0.5137      | 0.5568 | 0.0609 | 0.4175      | 0.4350      | 0.4263 | 0.0124 |
| 2.222               | 0.2945      | 0.2623      | 0.2784 | 0.0228 | 0.2086      | 0.2340      | 0.2213 | 0.0180 |
| 0.741               | 0.1340      | 0.1301      | 0.1321 | 0.0028 | 0.1153      | 0.1340      | 0.1247 | 0.0132 |
| 0.247               | 0.0898      | 0.0845      | 0.0872 | 0.0037 | 0.0835      | 0.0947      | 0.0891 | 0.0079 |
| 0.082               | 0.0787      | 0.0837      | 0.0812 | 0.0035 | 0.0736      | 0.0767      | 0.0752 | 0.0022 |
| 0.027               | 0.0741      | 0.0733      | 0.0737 | 0.0006 | 0.0722      | 0.0742      | 0.0732 | 0.0014 |
| 0.009               | 0.0783      | 0.0738      | 0.0761 | 0.0032 | 0.0683      | 0.0717      | 0.0700 | 0.0024 |
| Virus<br>(pfu/well) | Mu          |             |        |        | Omicron     |             |        |        |
|                     | Replicate 1 | Replicate 2 | Avg    | Std    | Replicate 1 | Replicate 2 | Avg    | Std    |
| 20                  | 1.0094      | 1.2787      | 1.1441 | 0.1904 | 0.0817      | 0.0835      | 0.0826 | 0.0013 |
| 6.667               | 0.7968      | 1.0203      | 0.9086 | 0.1580 | 0.0751      | 0.0770      | 0.0761 | 0.0013 |
| 2.222               | 0.4546      | 0.6230      | 0.5388 | 0.1191 | 0.0744      | 0.0733      | 0.0739 | 0.0008 |
| 0.741               | 0.1949      | 0.2636      | 0.2293 | 0.0486 | 0.0743      | 0.0717      | 0.0730 | 0.0018 |
| 0.247               | 0.1161      | 0.1401      | 0.1281 | 0.0170 | 0.0725      | 0.0693      | 0.0709 | 0.0023 |
| 0.082               | 0.0862      | 0.0984      | 0.0923 | 0.0086 | 0.0767      | 0.0704      | 0.0736 | 0.0045 |
| 0.027               | 0.0793      | 0.0861      | 0.0827 | 0.0048 | 0.0776      | 0.0779      | 0.0778 | 0.0002 |
| 0.009               | 0.0756      | 0.0865      | 0.0811 | 0.0077 | 0.0846      | 0.0788      | 0.0817 | 0.0041 |
